# Supplementary material for: Out of the Shadow: Blue Light Exposure Induces Apoptosis in Müller Cells
Source: MDPI journal article supplement (doi:10.3390/ijms232314540), 2022-11-22
Supplement: s1 [file s1]

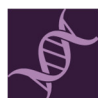

Supplementary Materials

# Out of the shadow: Blue light exposure induces p53-dependent apoptosis in Müller cells

Agnes Fietz <sup>1</sup>, José Hurst <sup>1\*</sup> and Sven Schnichels <sup>1</sup>

<sup>1</sup> Center for Ophthalmology Tübingen, University Eye Hospital Tübingen, 72076 Tübingen, Germany

\* Correspondence: jose.hurst@med.uni-tuebingen.de; Tel.: +4970712987883

**Table S1.** Original data for Figure 1: controls and blue light-exposed cells.

| Cell type | Time point (h) | ROS   | Caspase 3/7 | Viability | Density |
|-----------|----------------|-------|-------------|-----------|---------|
| MCs       | 1              |       | 50596       |           |         |
|           | 2              | 44657 | 99022       |           |         |
|           | 4              | 44694 | 65507       |           |         |
|           | 6              | 44081 | 89078       | 0,6935    | 1,211   |
|           | 12             | 49120 | 95779       | 0,8573    | 0,6647  |
|           | 18             |       | 56630       | 0,9056    | 0,8931  |
| MIO-M1    | 24             | 95923 | 321121      | 0,8194    | 0,7697  |
|           | 6              |       | 51313       | 0,79156   | 0,90404 |
|           | 12             |       | 106034      | 0,49139   | 0,66764 |
|           | 24             |       | 155200      | 0,43688   | 0,76965 |

| Cell type | Time point (h) | ROS    | Caspase 3/7 | Viability  | Density    |
|-----------|----------------|--------|-------------|------------|------------|
| MCs       | 1              |        | 45436       |            |            |
|           | 2              | 108814 | 51359       |            |            |
|           | 4              | 180752 | 120817      |            |            |
|           | 6              | 494176 | 372101      | 0,9056     | 1,293      |
|           | 12             | 257184 | 687723      | 0,7746     | 0,5687     |
|           | 18             |        | 343189      | 0,8106     | 0,7900     |
| MIO-M1    | 24             | 48931  | 492049      | 0,4804     | 0,4487     |
|           | 6              |        | 76186       | 0,78511    | 0,85155    |
|           | 12             |        | 77495       | 0,42195001 | 0,56582    |
|           | 24             |        | 195092      | 0,33501    | 0,71847001 |

The original data of Figure 2 are given as average values. The first table contains the controls, while the second table contains the blue light-exposed cells.

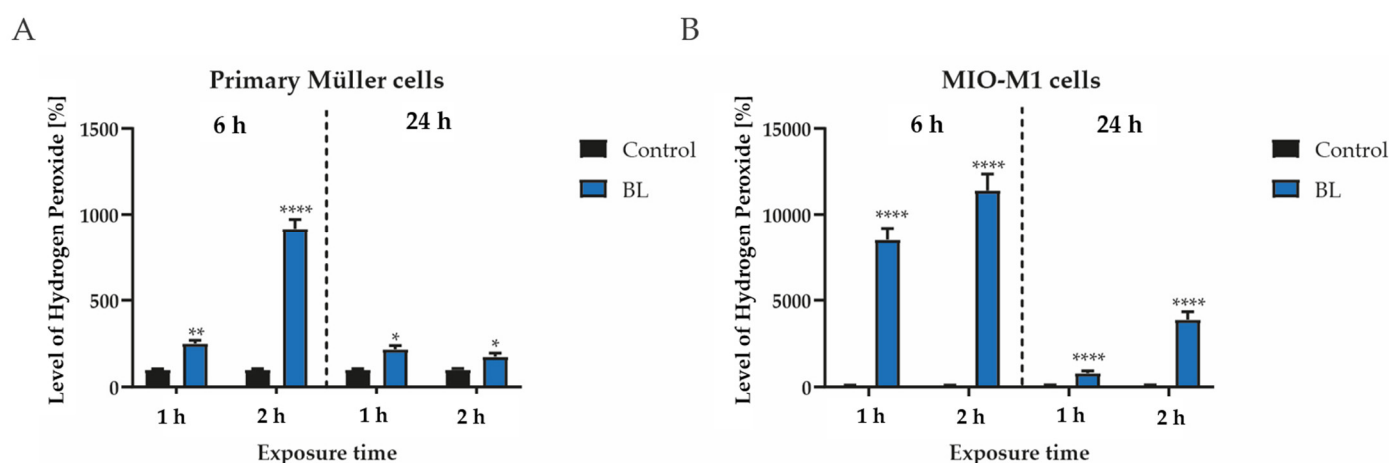

**Figure S1.** Oxidative stress can be induced in porcine Müller cell-derived cells, as well as in corresponding cell line MIO-M1, by blue light exposure. (A) Müller cell-derived cultures (MCs) and (B) human MIO-M1 cells were exposed to blue light (BL, 30 mW/cm<sup>2</sup>) for 1 or 2 h and cultivated for 6 or 24 h. The level of hydrogen peroxide was measured. After both 6 and 24 h, a significant and dose-dependent increase was detected in MC and MIO-M1 cells;  $n = 10$ . (Bar graphs represent the mean values and SEM. The control was set to 100%. Statistical differences are indicated as follows: \*  $p < 0.05$ , \*\*  $p < 0.01$ , \*\*\*  $p < 0.001$ , and \*\*\*\*  $p < 0.0001$  compared to control, according to Welch's one-way ANOVA.

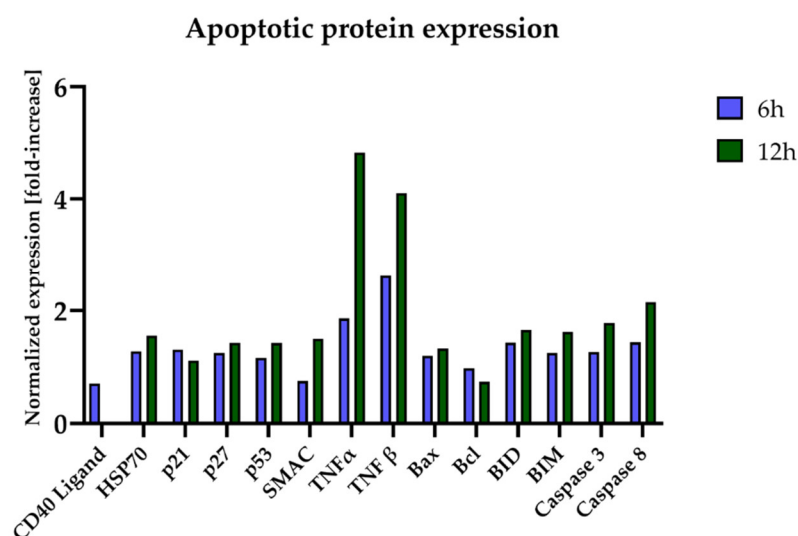

**Figure S2.** Pro-apoptotic protein expression was increased due to blue light exposure in porcine Müller cell-derived cells. Müller cell derived cells (MCs) were exposed to blue light (BL, 30 mW/cm<sup>2</sup>) and further cultivated for 6 or 12 h. Cell lysates were collected, and the human apoptosis array was performed with 2 mg/mL lysate/condition. Values were normalized to the control and represent fold-changes. An overall increase in pro-apoptotic protein expression was observed with an increase over time (6 to 12 h of cultivation). Five different samples were pooled for each condition ( $n = 5$ ); the assay was performed once. Duplicates for each protein were used; background values were subtracted from mean values and normalized to a positive control for each membrane/condition. Normalized values were compared to those from the unexposed controls, and the fold-increase is shown.

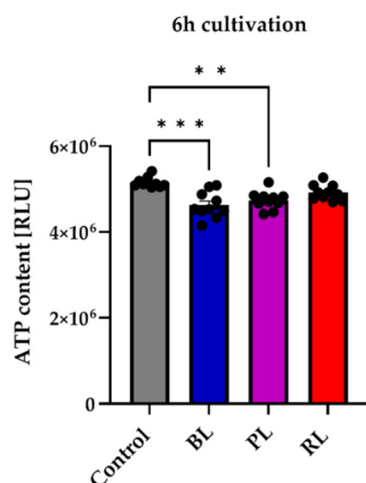

**Figure S3.** ATP content was only slightly decreased due to blue- or purple-light exposure, but not red light in porcine Müller cell-derived cells. Müller cell-derived cells (MCs) were exposed to blue (BL), purple (PL), or red light (RL) for 1.5 h and further cultivated for 6 h. Evaluation of ATP content revealed a slight decrease due to BL or PL exposure, but not due to RL. Bar graphs represent the mean values and SEM. Statistical differences are indicated as follows: \*  $p < 0.05$ , \*\*  $p < 0.01$ , \*\*\*  $p < 0.001$ , and \*\*\*\*  $p < 0.0001$  compared to control, according to Welch's one-way ANOVA.
